# Supplementary material for: Plasma Metabolite Profiles in First Episode Psychosis: Exploring Symptoms Heterogeneity/Severity in Schizophrenia and Bipolar Disorder Cohorts
Source: PubMed Central journal article supplement (PMC7290160; doi:10.3389/fpsyt.2020.00496), 2020-06-05

1A)

Scores Plot

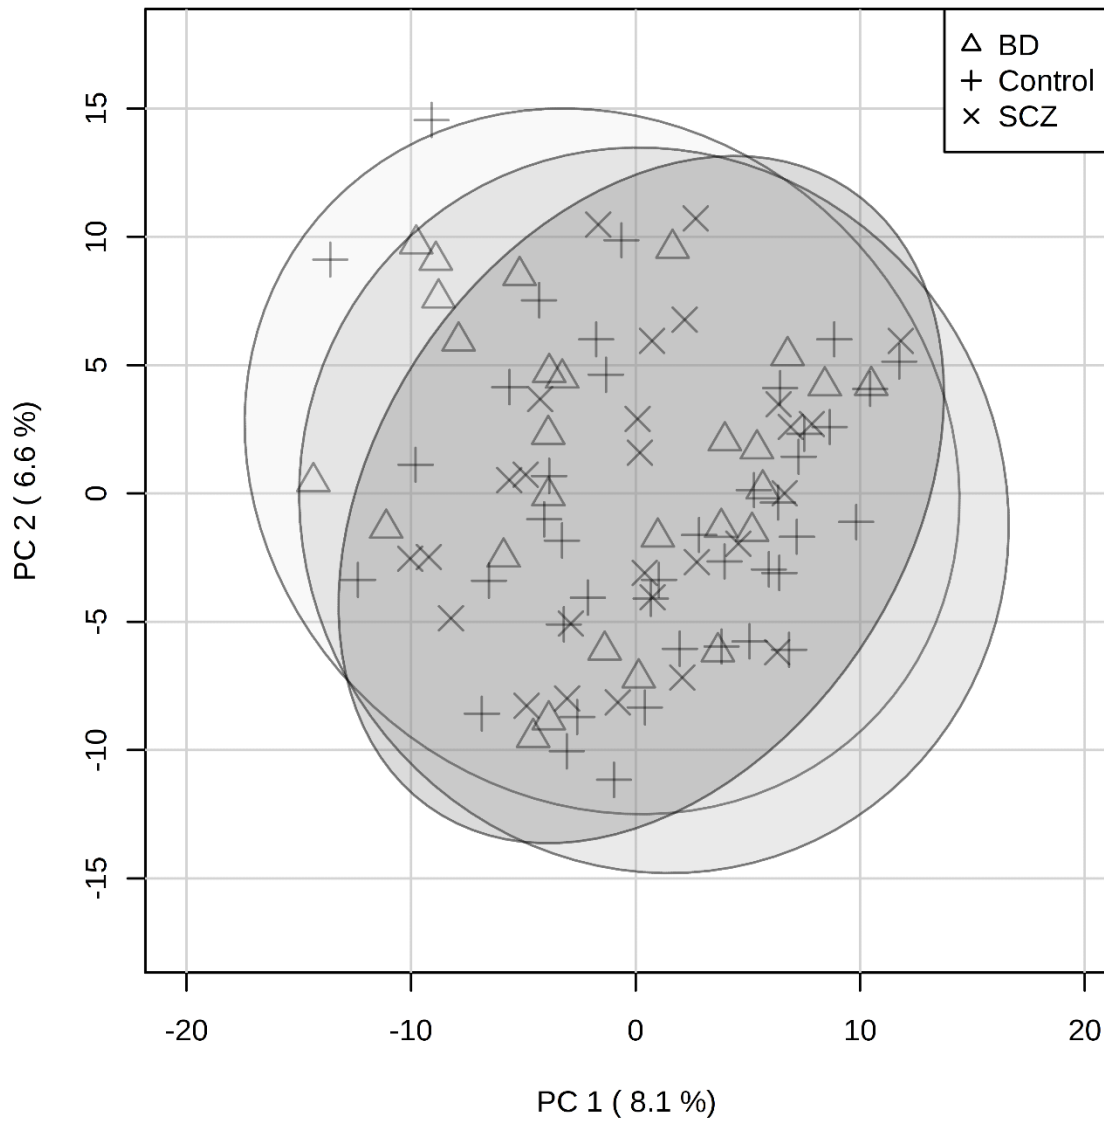

1B)

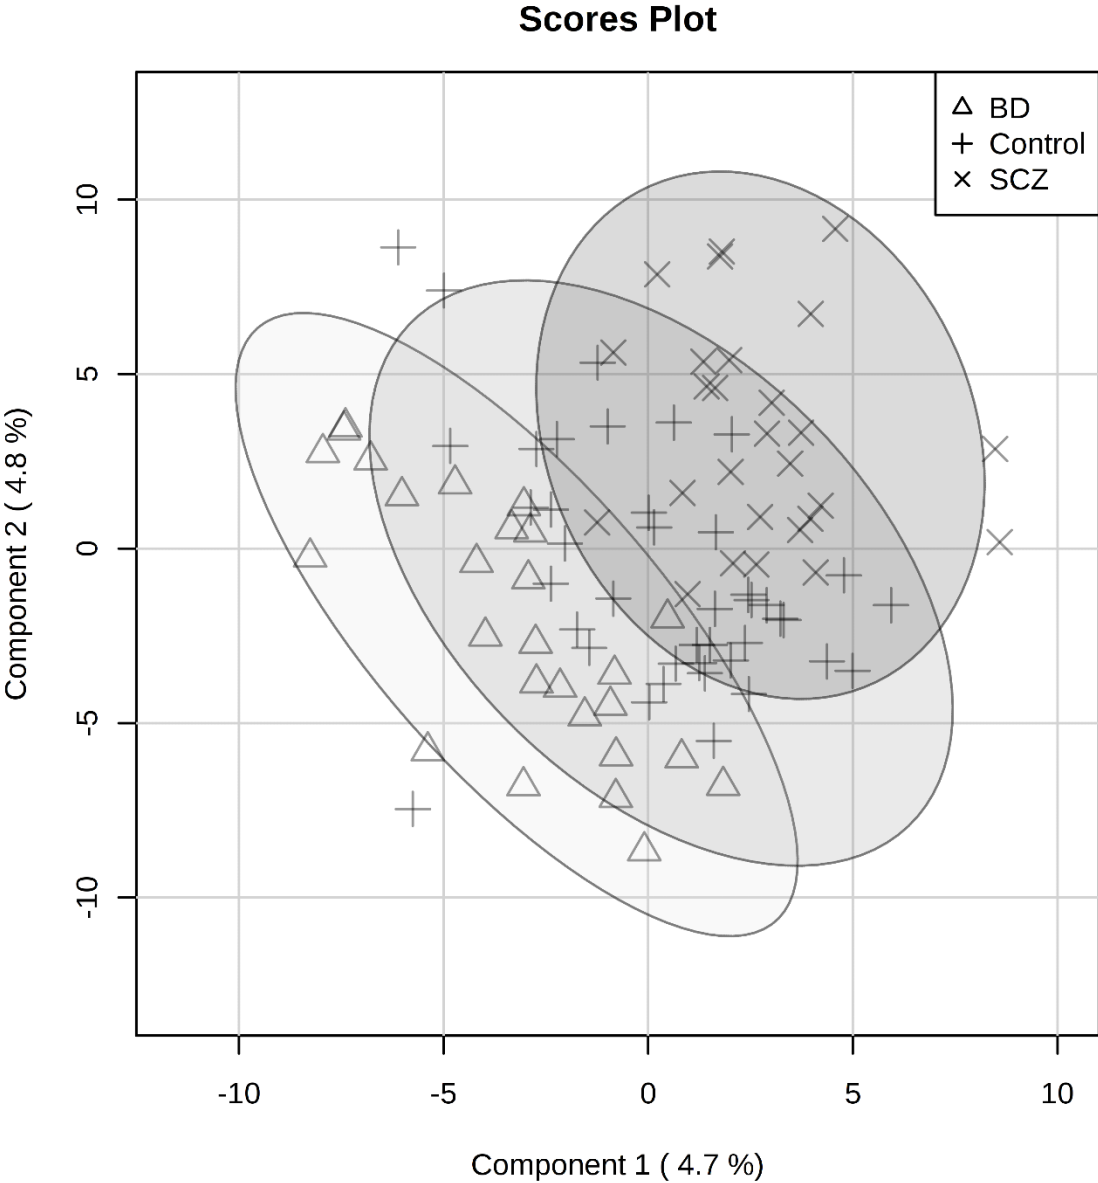

Supplement: Image_1.pdf [file Image_1.pdf]
